# Supplementary material for: Heterovalent chalcogen bonding: supramolecular assembly driven by the occurrence of a tellurium(ii)⋯Ch(i) (Ch = S, Se, Te) linkage
Source: Royal Society of Chemistry journal article supplement (doi:10.1039/d2qi01420c), 2022-01-01
Supplement: d2qi01420c1.pdf [file d2qi01420c1.pdf]

## Electronic Supporting Information

### Heterovalent Chalcogen Bonding. Supramolecular Assembly Driven by the Occurrence of the Tellurium(II)···Ch(I) (Ch = S, Se, Te) Linkage

Yury V. Torubaev <sup>a,b\*</sup>, Anton V. Rozhkov <sup>c</sup>, Ivan V. Skabitsky <sup>a</sup>, Rosa M. Gomila <sup>d</sup>, Antonio Frontera <sup>d</sup>, Vadim Yu. Kukushkin <sup>c,e\*</sup>

- 
- a.* N. S. Kurnakov Institute of General and Inorganic Chemistry, of Russian Academy of Sciences, Moscow, 119991 Russian Federation. E-mail: [torubaev@igic.ras.ru](mailto:torubaev@igic.ras.ru)
- b.* Department of Molecular Chemistry and Materials Science, Weizmann Institute of Science, Rehovot 7610001, Israel
- c.* Institute of Chemistry, Saint Petersburg State University, Universitetskaya Nab. 7/9, Saint Petersburg, 199034 Russian Federation. E-mail: [v.kukushkin@spbu.ru](mailto:v.kukushkin@spbu.ru)
- d.* Department of Chemistry, Universitat de les Illes Balears, 07122 Palma de Mallorca, Balears, Spain. E-mail: [toni.frontera@uib.es](mailto:toni.frontera@uib.es)
- e.* Institute of Chemistry and Pharmaceutical Technologies, Altai State University, 656049 Barnaul, Russian Federation

## Contents

|                                                                                                                |           |
|----------------------------------------------------------------------------------------------------------------|-----------|
| <b>Crystal data and structure refinement .....</b>                                                             | <b>3</b>  |
| <b>The Cambridge Structural Database (CSD) search for heterovalent Ch···Te (Ch = S, Se, Te) contacts .....</b> | <b>5</b>  |
| <b>Computational details .....</b>                                                                             | <b>9</b>  |
| <b>Thermal properties of Ph<sub>2</sub>Ch<sub>2</sub> (Ch = S, Se, Te) and adducts 1–4.....</b>                | <b>11</b> |
| <b>Heterovalent chalcogen bonding in solution .....</b>                                                        | <b>15</b> |

## Crystal data and structure refinement

**Table S1.** Crystal data and structure refinement for 1–4.

| Identification code                | 1                                                                 | 2                                                                  | 3                                                               | 4                                                                                |
|------------------------------------|-------------------------------------------------------------------|--------------------------------------------------------------------|-----------------------------------------------------------------|----------------------------------------------------------------------------------|
| Empirical formula                  | C <sub>26</sub> H <sub>10</sub> F <sub>14</sub> S <sub>2</sub> Te | C <sub>26</sub> H <sub>10</sub> F <sub>14</sub> Se <sub>2</sub> Te | C <sub>26</sub> H <sub>10</sub> F <sub>14</sub> Te <sub>3</sub> | C <sub>22</sub> H <sub>10</sub> F <sub>8</sub> N <sub>2</sub> Se <sub>2</sub> Te |
| Formula weight                     | 780.06                                                            | 873.86                                                             | 971.14                                                          | 739.84                                                                           |
| Temperature, K                     | 100(2)                                                            | 100(2)                                                             | 100(2)                                                          | 100(2)                                                                           |
| Crystal size, mm                   | 0.07 × 0.02 × 0.01                                                | 0.3 × 0.1 × 0.1                                                    | 0.49 × 0.38 × 0.27                                              | 0.1 × 0.1 × 0.06                                                                 |
| Wavelength, Å                      | 1.54184                                                           | 0.71073                                                            | 0.71073                                                         | 1.54184                                                                          |
| Crystal system                     | orthorhombic                                                      | triclinic                                                          | monoclinic                                                      | triclinic                                                                        |
| Space group                        | Pna2 <sub>1</sub>                                                 | P-1                                                                | P2/n                                                            | P-1                                                                              |
| <i>a</i> , Å                       | 27.4374(4)                                                        | 5.8848(3)                                                          | 20.3887(10)                                                     | 5.8234(2)                                                                        |
| <i>b</i> , Å                       | 17.3113(2)                                                        | 14.7941(8)                                                         | 6.3639(3)                                                       | 14.1653(3)                                                                       |
| <i>c</i> , Å                       | 5.48880(10)                                                       | 15.6028(9)                                                         | 21.1622(9)                                                      | 15.1819(4)                                                                       |
| $\alpha$ , deg.                    | 90                                                                | 92.780(2)                                                          | 90                                                              | 66.908(2)                                                                        |
| $\beta$ , deg.                     | 90                                                                | 93.866(2)                                                          | 93.483(2)                                                       | 84.933(2)                                                                        |
| $\gamma$ , deg.                    | 90                                                                | 96.426(2)                                                          | 90                                                              | 84.565(2)                                                                        |
| <i>V</i> , Å <sup>3</sup>          | 2607.05(7)                                                        | 1344.62(13)                                                        | 2740.8(2)                                                       | 1145.04(6)                                                                       |
| <i>Z</i>                           | 4                                                                 | 2                                                                  | 4                                                               | 2                                                                                |
| Density (calc.), g/cm <sup>3</sup> | 1.987                                                             | 2.158                                                              | 2.354                                                           | 2.146                                                                            |
| $\mu$ , mm <sup>-1</sup>           | 11.623                                                            | 3.928                                                              | 3.285                                                           | 14.640                                                                           |
| <i>F</i> (000)                     | 1504.0                                                            | 824.0                                                              | 1792.0                                                          | 696.0                                                                            |
| 2 $\Theta$ range for data          | 6.036 to 144.992                                                  | 3.922 to 57.99                                                     | 5.388 to 59.994                                                 | 6.338 to 152.822                                                                 |

|                                               |                                                               |                                                               |                                                               |                                                               |
|-----------------------------------------------|---------------------------------------------------------------|---------------------------------------------------------------|---------------------------------------------------------------|---------------------------------------------------------------|
| collection, deg.                              |                                                               |                                                               |                                                               |                                                               |
| Index ranges                                  | $-33 \leq h \leq 33, -20 \leq k \leq 21, -6 \leq l \leq 6$    | $-8 \leq h \leq 8, -20 \leq k \leq 20, -21 \leq l \leq 21$    | $-28 \leq h \leq 28, -8 \leq k \leq 8, -29 \leq l \leq 29$    | $-7 \leq h \leq 7, -17 \leq k \leq 17, -17 \leq l \leq 19$    |
| Reflections collected                         | 37253                                                         | 20900                                                         | 49700                                                         | 18274                                                         |
| Independent reflections                       | 5129 [ $R_{\text{int}} = 0.1278, R_{\text{sigma}} = 0.0568$ ] | 7113 [ $R_{\text{int}} = 0.0874, R_{\text{sigma}} = 0.1200$ ] | 7968 [ $R_{\text{int}} = 0.0472, R_{\text{sigma}} = 0.0287$ ] | 4729 [ $R_{\text{int}} = 0.0485, R_{\text{sigma}} = 0.0330$ ] |
| $R_1 / wR_2 (I > 2\sigma(I))$                 | 0.0710/0.1635                                                 | 0.0458/0.0793                                                 | 0.0214/0.0462                                                 | 0.0300/0.0763                                                 |
| $R_1 / wR_2$ (all data)                       | 0.0751/0.1650                                                 | 0.1074/0.0955                                                 | 0.0247/0.0479                                                 | 0.0306/0.0771                                                 |
| Goodness-of-fit on $F^2$                      | 1.070                                                         | 0.948                                                         | 1.089                                                         | 1.056                                                         |
| Largest diff. peak/hole, $e \text{ \AA}^{-3}$ | 0.89/-1.23                                                    | 0.91/-0.77                                                    | 0.67/-0.65                                                    | 1.27/-1.10                                                    |

The Cambridge Structural Database (CSD) search for heterovalent  $\text{Ch}\cdots\text{Te}$  ( $\text{Ch} = \text{S}, \text{Se}, \text{Te}$ ) contacts

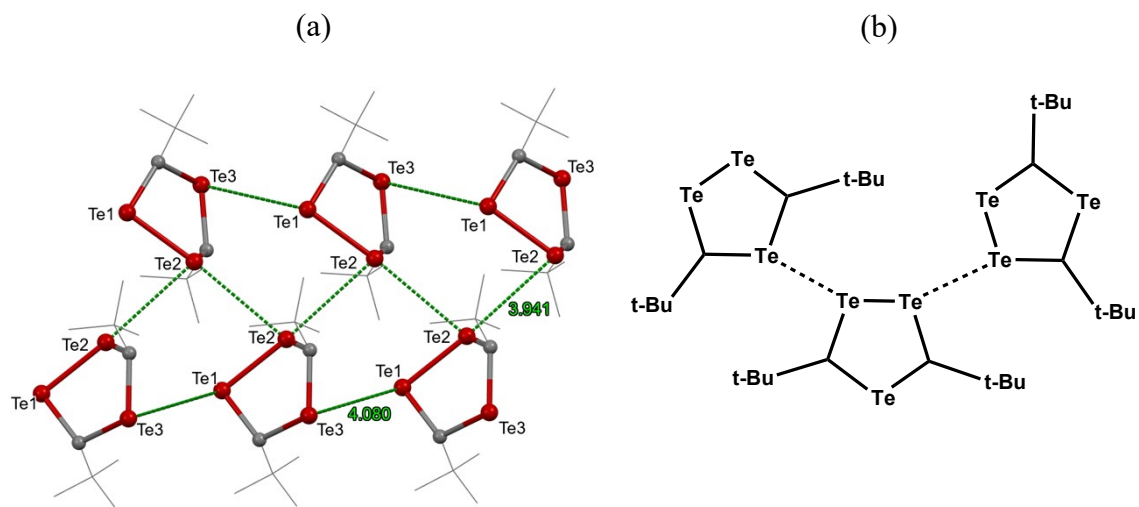

**Figure S1.** (a) A fragment of the crystal structure of  $\text{TeI}_2(\text{CH}^t\text{Bu})_2\text{Te}^{\text{II}}$  (CSD refcode: COWQUB). The dotted lines denote significantly shortened contacts exhibiting distances smaller than  $R_{\text{vdW}}(\text{Te})+R_{\text{vdW}}(\text{Te})$ . *tert*-Butyl groups are omitted for clarity; (b) Schematic representation of discussed contacts.

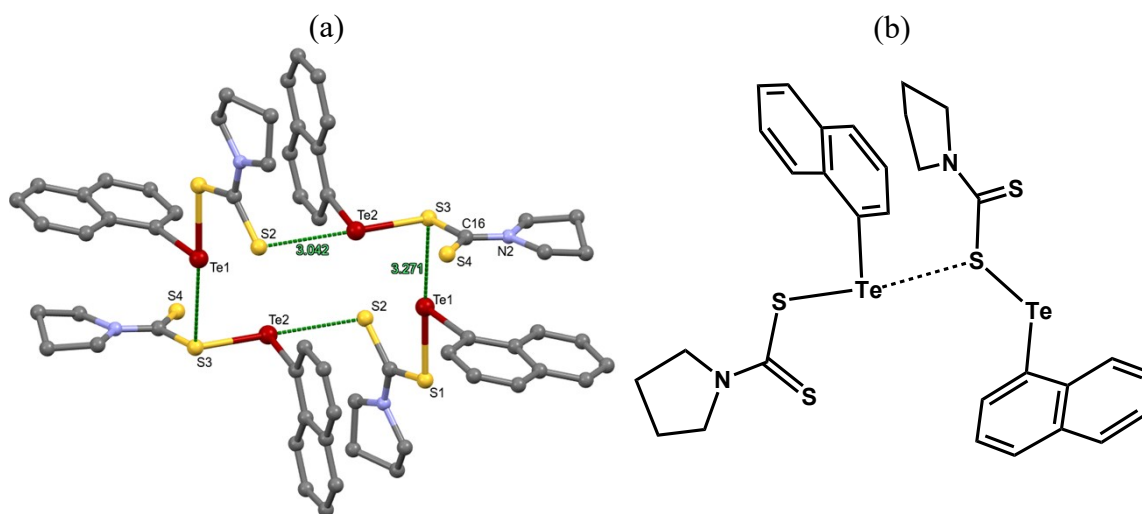

**Figure S2.** (a) A fragment of the crystal structure of dithiocarbamatopyrrolidine naphthyl tellurium (II) (CSD refcode: KOLTAH). The dotted lines denote significantly shortened contacts exhibiting distances smaller than  $R_{\text{vdW}}(\text{Te})+R_{\text{vdW}}(\text{Te})$ . Hydrogen atoms are omitted for clarity; (b) Schematic representation of discussed contacts.

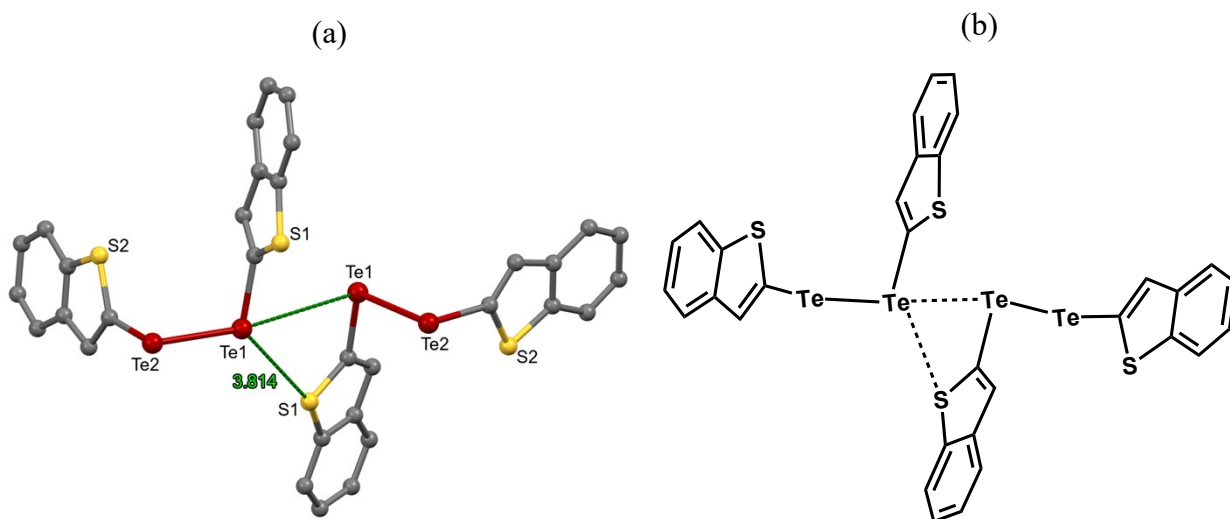

**Figure S3.** (a) A fragment of the crystal packing of bis(2-Benzo(b)thienyl)-di-tellurium (CSD refcode: VIBNEZ) (b) Schematic representation of discussed contacts.

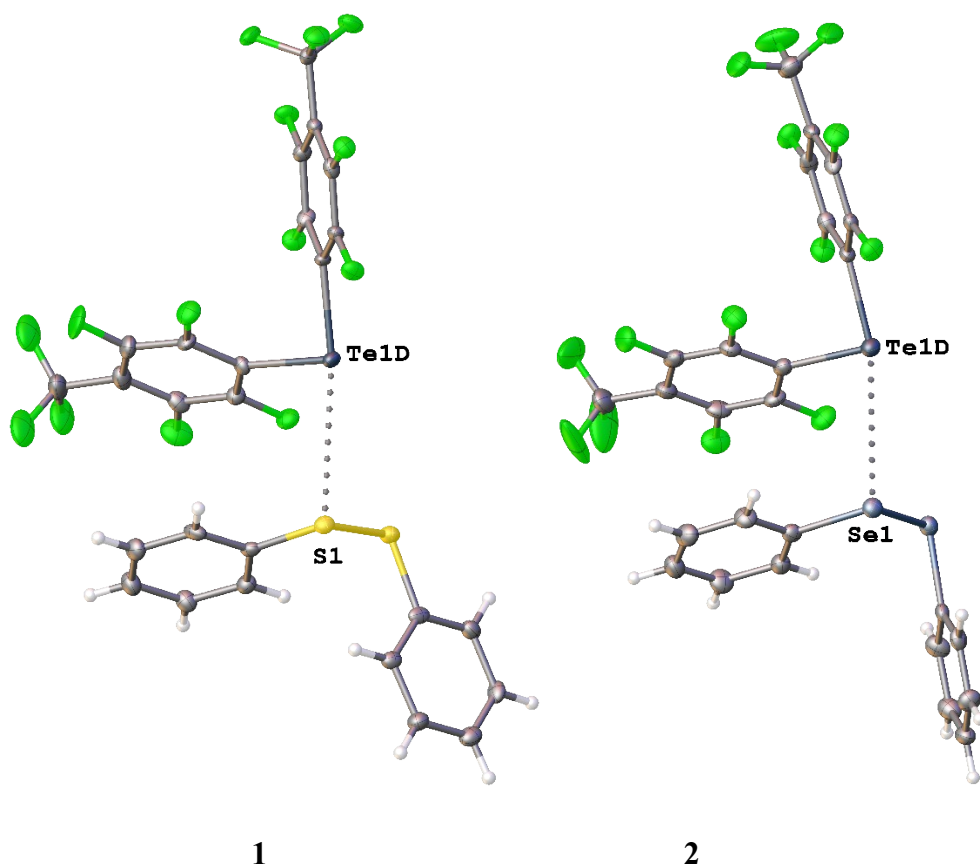

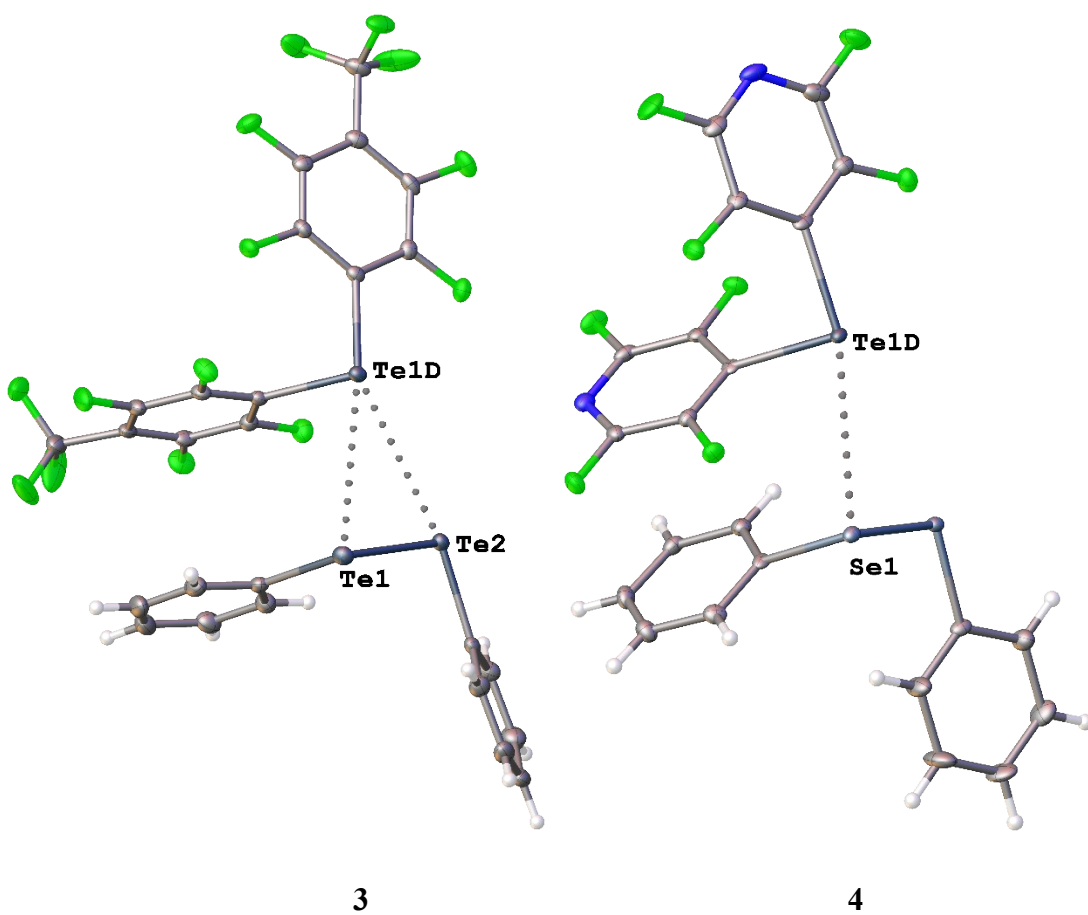

**Figure S4.** Geometry of the dimeric associates in 1–4.

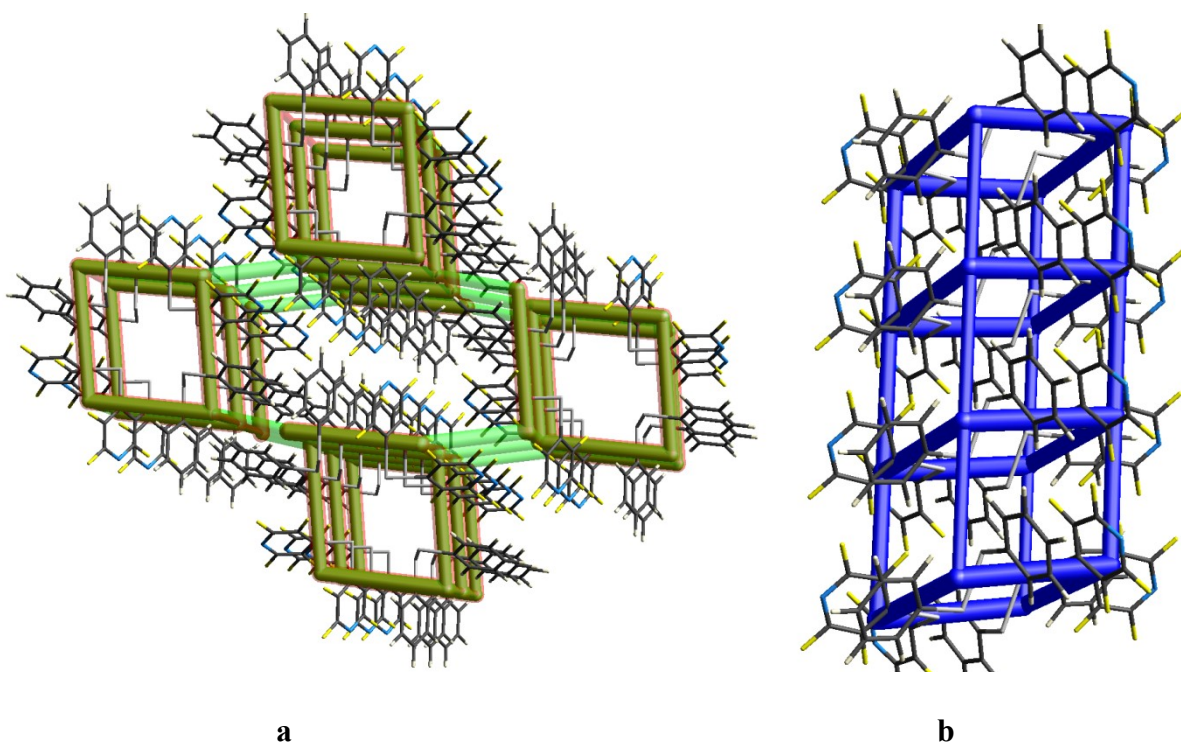

**Figure S5.** A fragment of the energy framework for **4** (a, b). Electrostatic component of total intermolecular interaction energy is given in red, while its dispersion component in green; total intermolecular interaction energy is provided in blue.

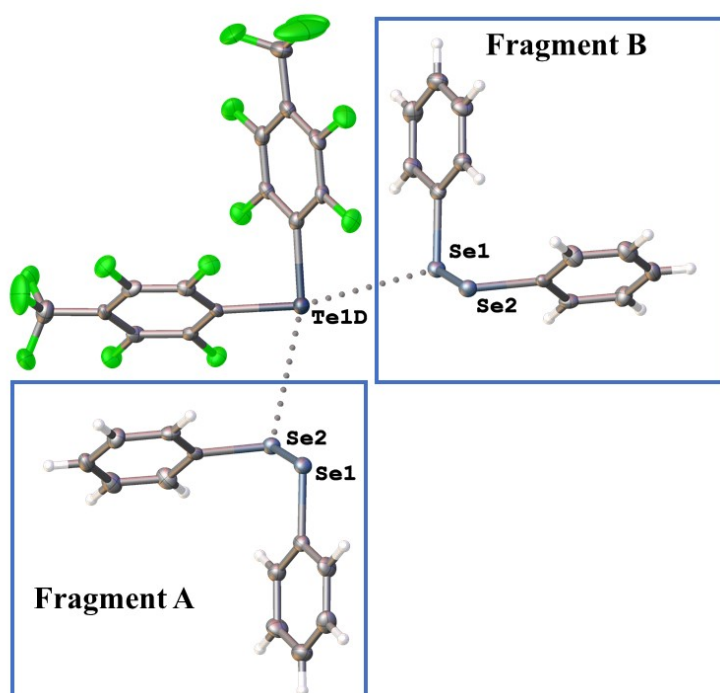

**Figure S6.** Fragments of **2**.



## Computational details

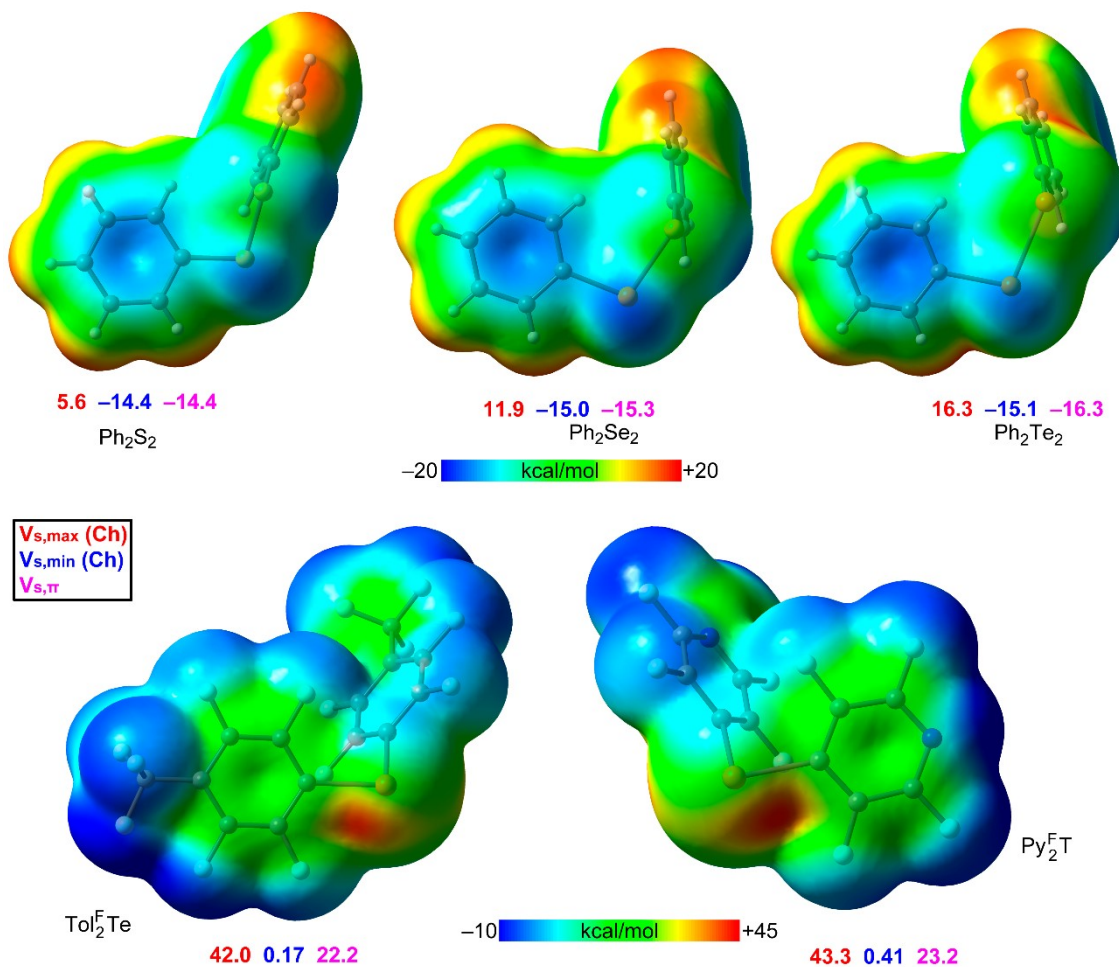

**Figure S7.** MEP surfaces of the Ch<sup>I</sup> (a) and Ch<sup>II</sup> (b) partners used in this work at the PBE0-D3/def2-TZVP. Values in red and blue correspond to maximum and minimum values at the Ch-atom. Values in fuchsia are measured over the center of the aromatic rings. Isovalue 0.001 a.u. Values in kcal/mol.

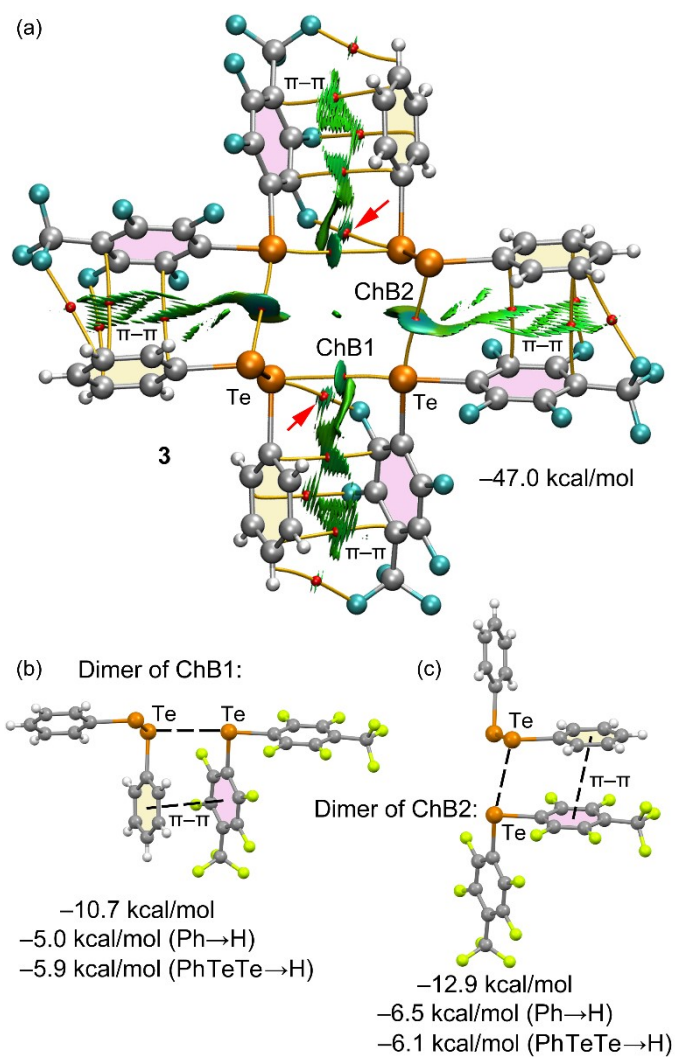

**Figure S8.** (a) Combined QTAIM (bond CPs in red and bond paths as orange lines) and NCIPLOT (RDG isosurface 0.45 a.u.,  $\rho_{\text{cut-off}} = 0.04$  a.u., range  $-0.035 \leq (\text{sign}\lambda_2)\rho \leq 0.035$  a.u.) analyses of the tetramer of **3**; (b,c) Two dimers extracted from the tetramer with indication of the interaction energies and those of their mutated dimers.

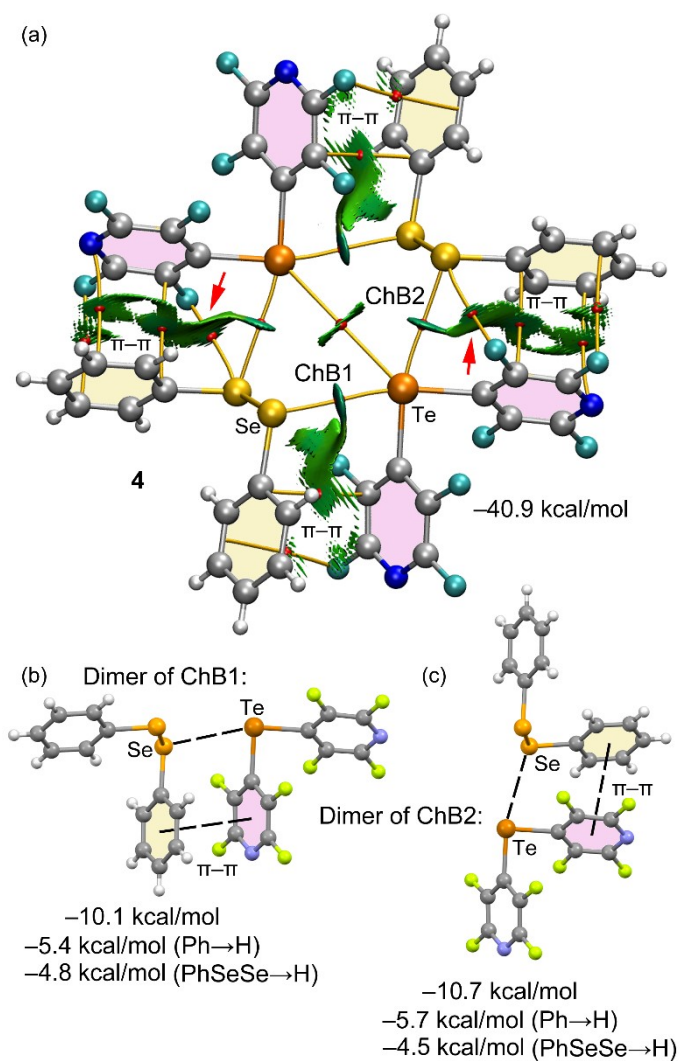

**Figure S9.** (a) Combined QTAIM (bond CPs in red and bond paths as orange lines) and NCIPplot (RDG isosurface 0.45 a.u.,  $\rho_{\text{cut-off}} = 0.04$  a.u., range  $-0.035 \leq (\text{sign}\lambda_2)\rho \leq 0.035$  a.u.) analyses of the tetramer of **4**; (b,c) Two dimers extracted from the tetramer with indication of the interaction energies and those of their mutated dimers.

**Table S2.** QTAIM parameters (electron density, Lagrangian kinetic energy density, potential energy density and Laplacian of electron density, in a.u.) at the bond CPs characterizing the ChBs in compounds **1–4**. See Figure 2 (main text) for labelling of atoms.

| CP                 | $\rho$   | $G_r$    | $V_r$     | $H_r$     | $\nabla^2\rho$ |
|--------------------|----------|----------|-----------|-----------|----------------|
| <b>Compound 1</b>  |          |          |           |           |                |
| S1 $\cdots$ Te1D   | 1.21E-02 | 6.27E-03 | -5.50E-03 | 7.74E-04  | 2.82E-02       |
| <b>Compound 2</b>  |          |          |           |           |                |
| Se1 $\cdots$ Te1D  | 1.36E-02 | 6.49E-03 | -6.23E-03 | 2.67E-04  | 2.70E-02       |
| Se2 $\cdots$ Te1D  | 1.22E-02 | 5.86E-03 | -5.45E-03 | 4.15E-04  | 2.51E-02       |
| Te1D $\cdots$ Te1D | 1.43E-03 | 6.90E-04 | -4.29E-04 | 2.61E-04  | 3.81E-03       |
| <b>Compound 3</b>  |          |          |           |           |                |
| Te1 $\cdots$ Te1D  | 1.03E-02 | 4.21E-03 | -3.90E-03 | 3.04E-04  | 1.80E-02       |
| Te2 $\cdots$ Te1D  | 1.47E-02 | 6.20E-03 | -6.31E-03 | -1.03E-04 | 2.44E-02       |
| F $\cdots$ Te2     | 9.15E-03 | 6.67E-03 | -5.02E-03 | 1.65E-03  | 3.33E-02       |
| <b>Compound 4</b>  |          |          |           |           |                |
| Se1 $\cdots$ Te1D  | 1.22E-02 | 5.81E-03 | -5.42E-03 | 3.93E-04  | 2.48E-02       |
| Se2 $\cdots$ Te1D  | 1.44E-02 | 6.89E-03 | -6.71E-03 | 1.85E-04  | 2.83E-02       |
| F $\cdots$ Se2     | 6.64E-03 | 5.20E-03 | -3.72E-03 | 1.49E-03  | 2.67E-02       |
| Te1D $\cdots$ Te1D | 1.74E-03 | 8.40E-04 | -5.38E-04 | 3.02E-04  | 4.56E-03       |

Thermal properties of  $\text{Ph}_2\text{Ch}_2$  (Ch = S, Se, Te) and adducts 1–4

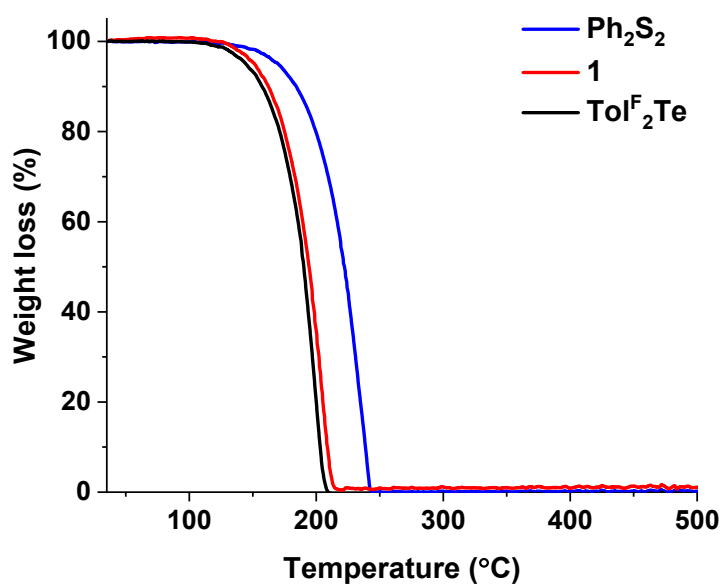

Figure S10. TGA curves of  $\text{Ph}_2\text{S}_2$  (blue), **1** (red) and  $\text{Tol}^{\text{F}_2}\text{Te}$  (black).

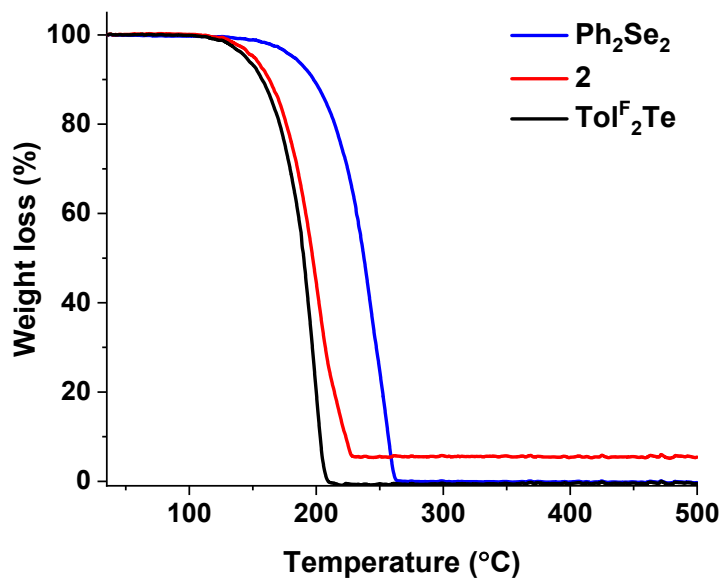

Figure S11. TGA curves of  $\text{Ph}_2\text{Se}_2$  (blue), **2** (red) and  $\text{Tol}^{\text{F}_2}\text{Te}$  (black).

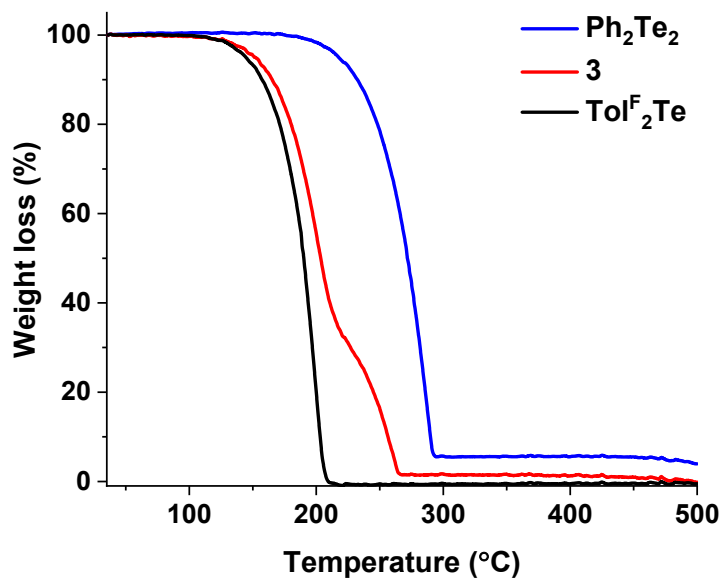

Figure S12. TGA curves of  $\text{Ph}_2\text{Te}_2$  (black), **3** (red) and  $\text{Tol}^{\text{F}_2}\text{Te}$  (black).

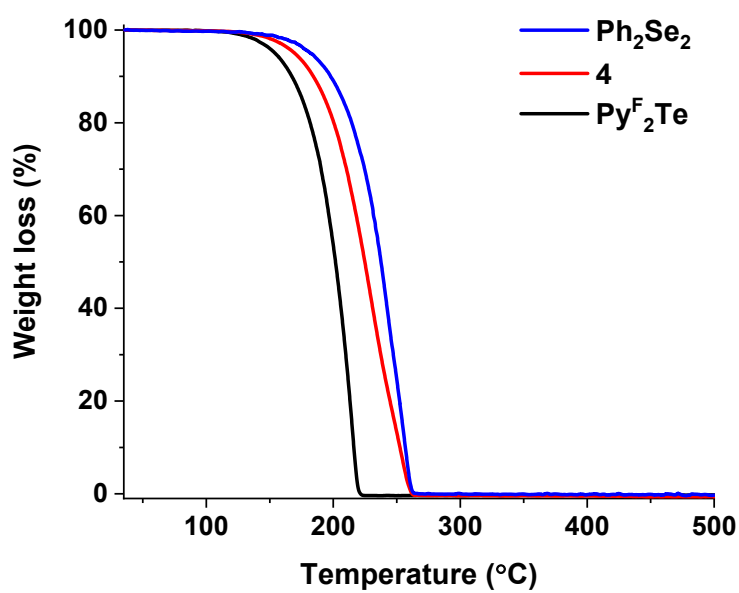

Figure S13. TGA curves of  $\text{Ph}_2\text{Se}_2$  (blue), **4** (red) and  $\text{Py}^{\text{F}_2}\text{Te}$  (black).

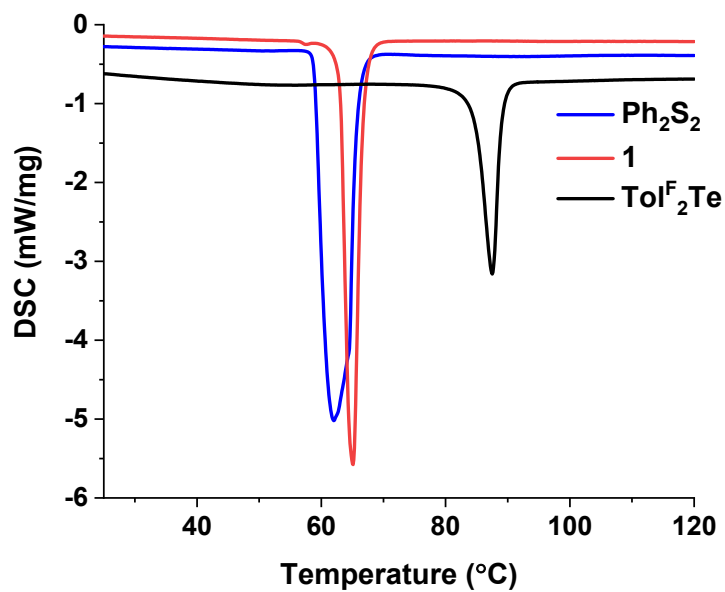

Figure S14. DSC curves of Ph<sub>2</sub>S<sub>2</sub> (blue), **1** (red) and Tol<sup>F</sup><sub>2</sub>Te (black).

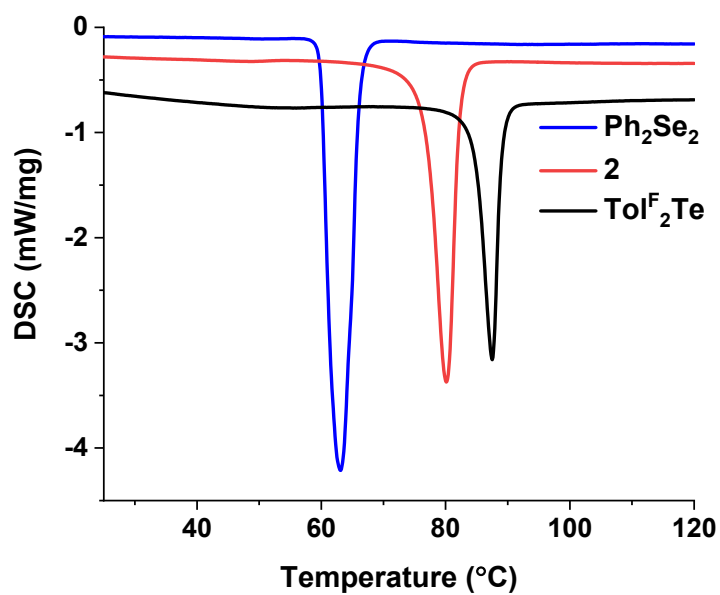

Figure S15. DSC curves of Ph<sub>2</sub>Se<sub>2</sub> (blue), **2** (red) and Tol<sup>F</sup><sub>2</sub>Te (black).

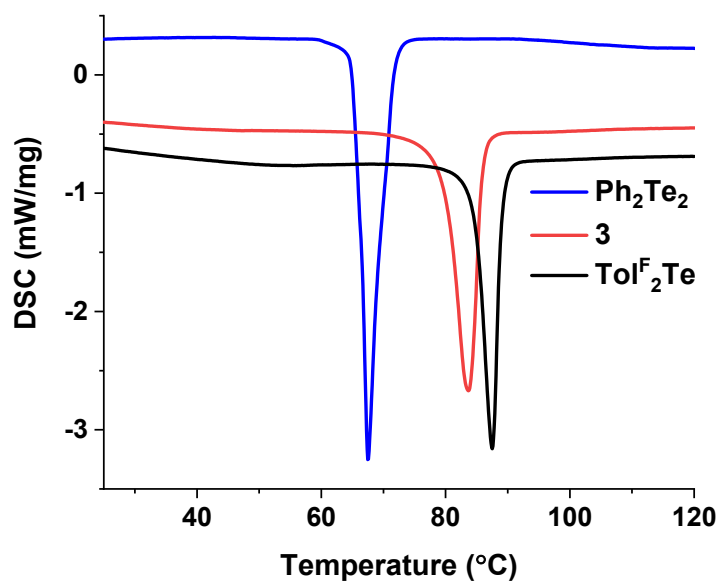

**Figure S16.** DSC curves of  $\text{Ph}_2\text{Te}_2$  (blue), **3** (red) and  $\text{Tol}^{\text{F}_2}\text{Te}$  (black).

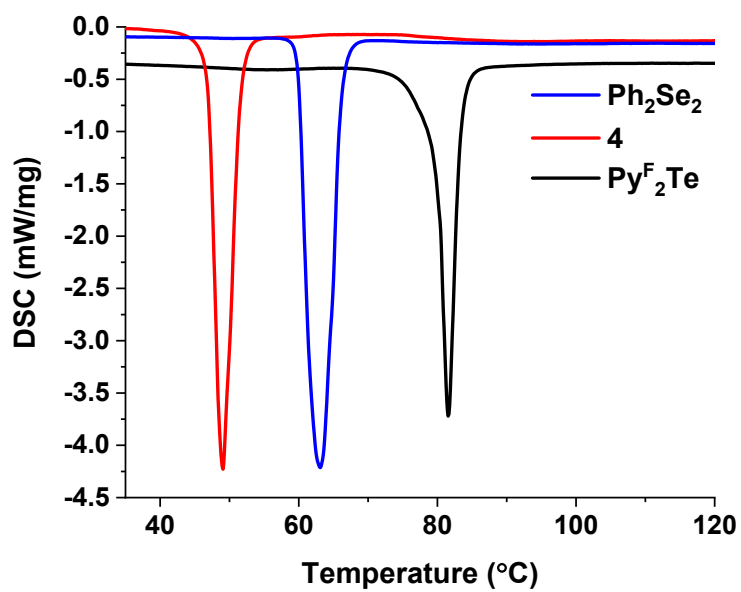

**Figure S17.** DSC curves of  $\text{Ph}_2\text{Se}_2$  (blue), **4** (red) and  $\text{Py}^{\text{F}_2}\text{Te}$  (black).



**Table S3.** Thermal properties of **1–4**.

| Entry                           | mp, °C | T <sub>d</sub> , °C* |
|---------------------------------|--------|----------------------|
| TolF <sub>2</sub> Te            | 88     | 144                  |
| Ph <sub>2</sub> S <sub>2</sub>  | 62     | 170                  |
| <b>1</b>                        | 65     | 151                  |
| Ph <sub>2</sub> Se <sub>2</sub> | 63     | 182                  |
| <b>2</b>                        | 82     | 151                  |
| Ph <sub>2</sub> Te <sub>2</sub> | 68     | 217                  |
| <b>3</b>                        | 85     | 152                  |
| PyF <sub>2</sub> Te             | 82     | 154                  |
| <b>4</b>                        | 49     | 169                  |

\* Related to 5% weight loss.

### Heterovalent chalcogen bonding in solution

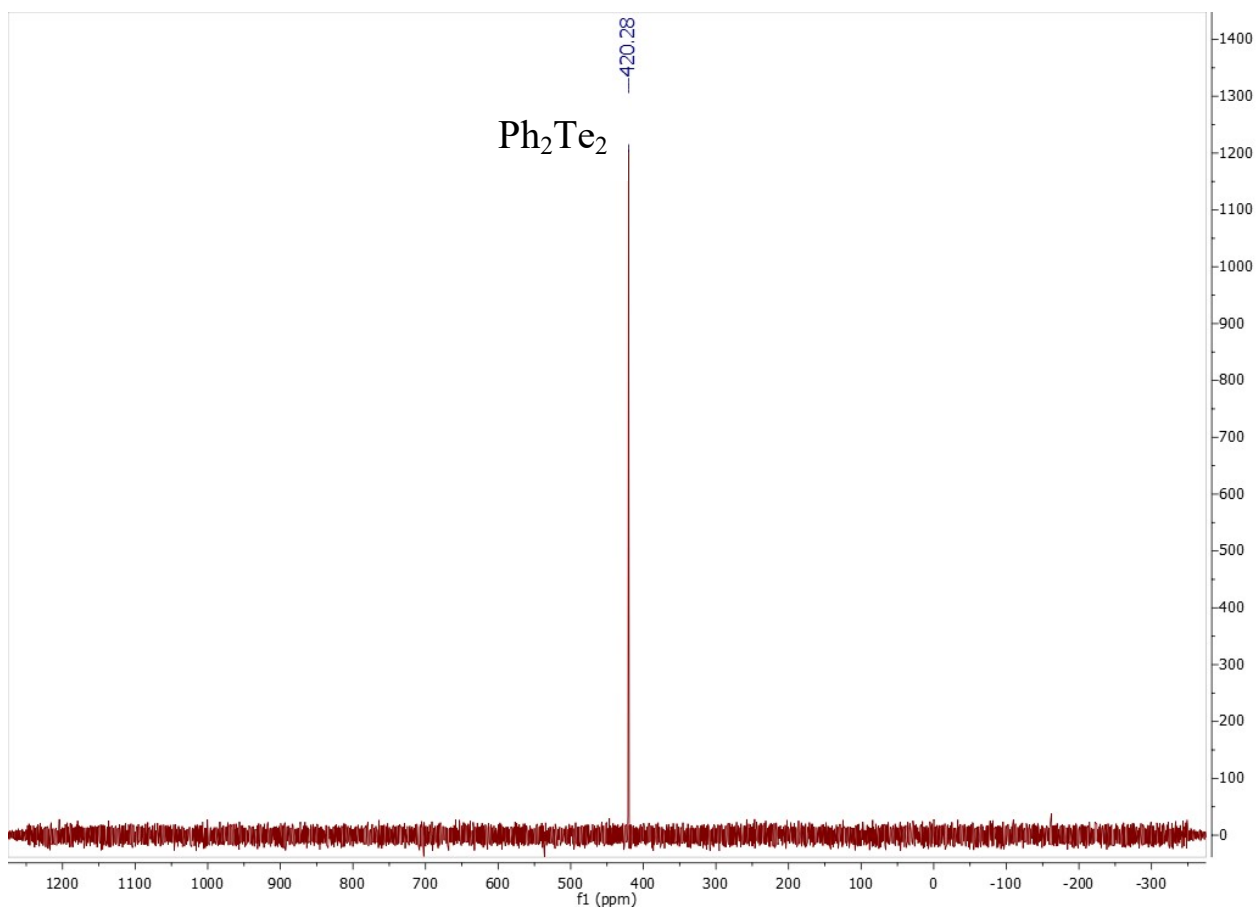

**Figure S18.** <sup>125</sup>Te NMR spectrum of Ph<sub>2</sub>Te<sub>2</sub> in CDCl<sub>3</sub> at 298 K.

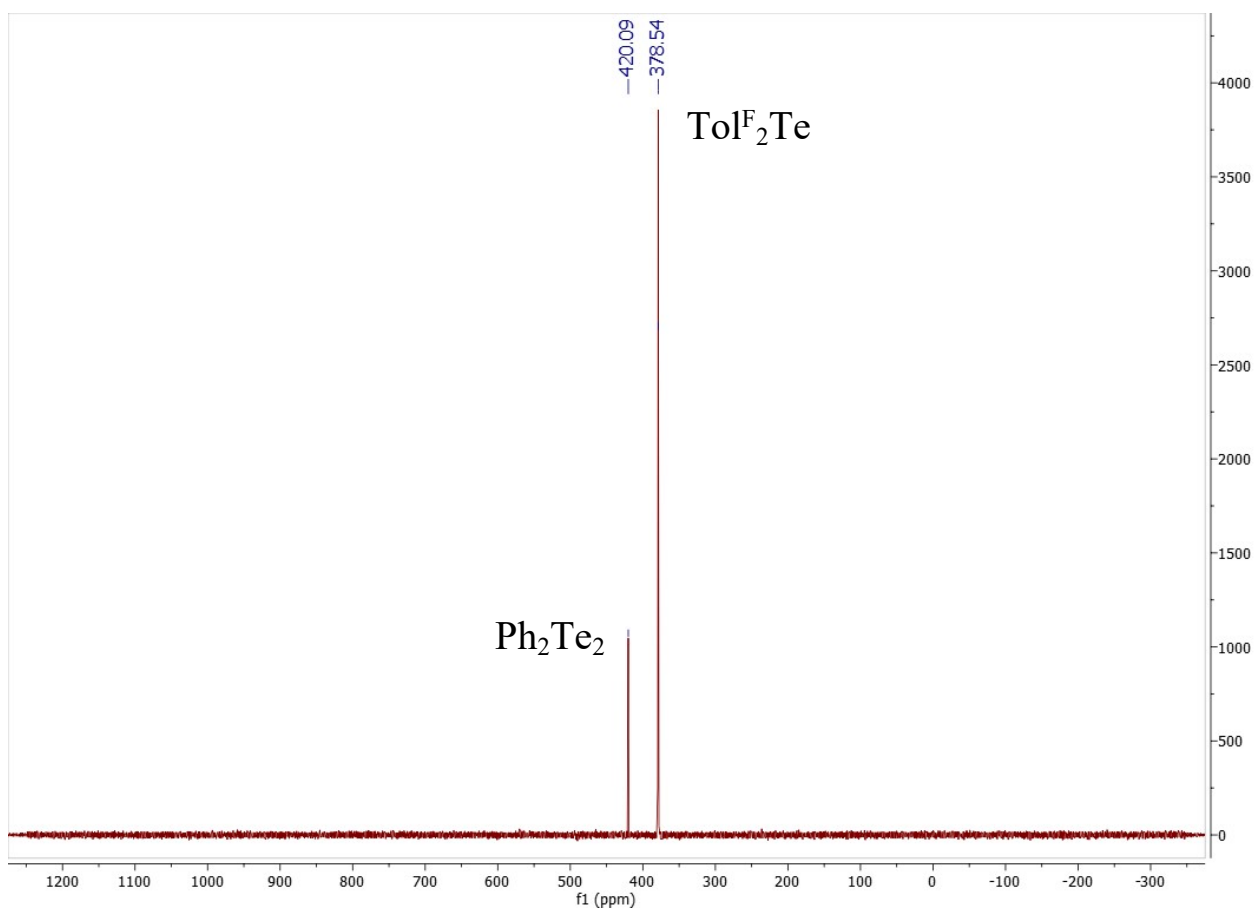

**Figure S19.**  $^{125}\text{Te}$  NMR spectrum of mixture  $\text{Tol}^{\text{F}}_2\text{Te}:\text{Ph}_2\text{Te}_2$  in molar ratio 20:1 in  $\text{CDCl}_3$  at 298 K.

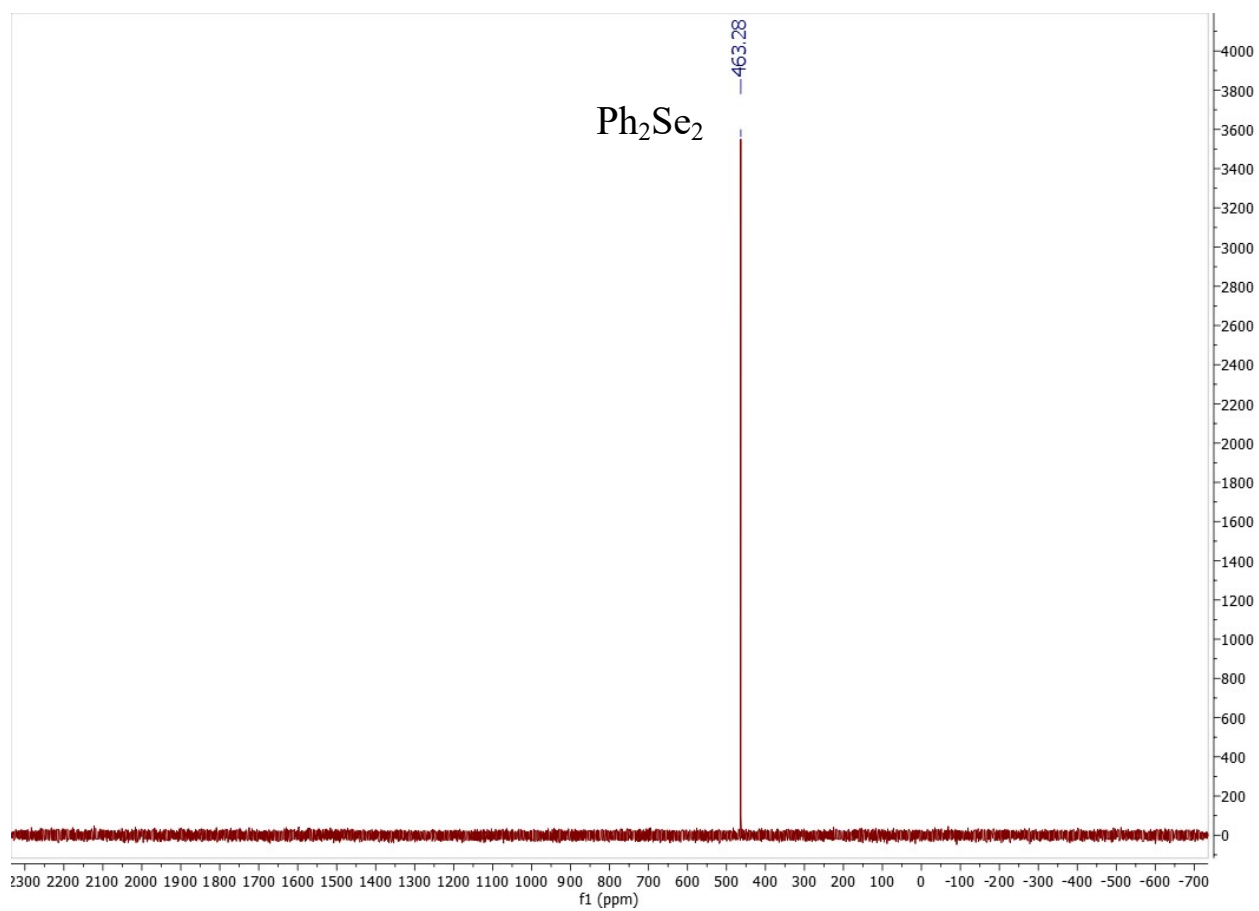

**Figure S20.**  $^{77}\text{Se}$  NMR spectrum of  $\text{Ph}_2\text{Se}_2$  in  $\text{CDCl}_3$  at 298 K.

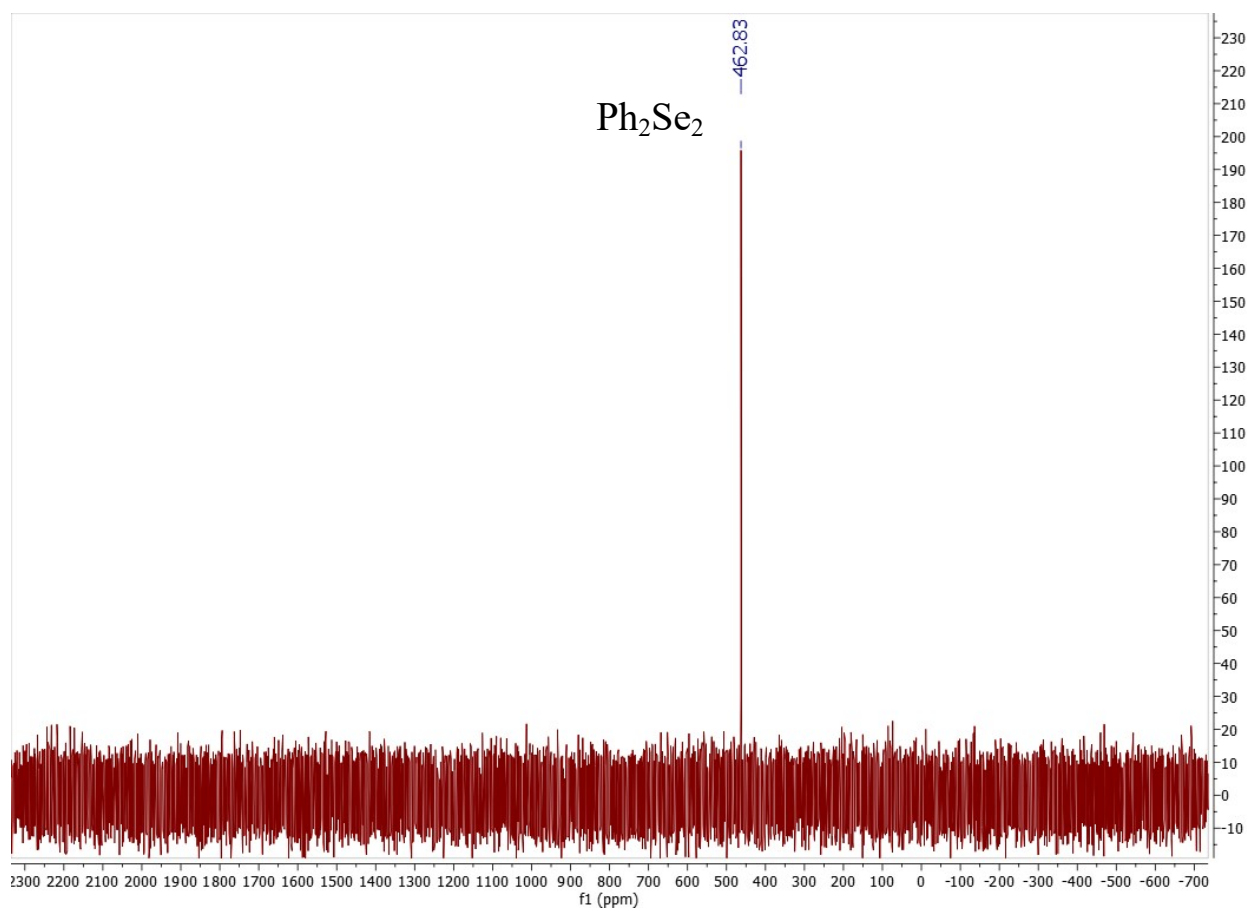

**Figure S21.**  $^{77}\text{Se}$  NMR spectrum of mixture  $\text{TolF}_2\text{Te}:\text{Ph}_2\text{Se}_2$  in molar ratio 20:1 in  $\text{CDCl}_3$  at 298 K.
